# Supplementary material
Source: PubMed Central journal article supplement (PMC3285246)
Supplement: NIHMS345175-supplement-1_si_001.pdf [file NIHMS345175-supplement-1_si_001.pdf]

Supporting Information

for

**Optimization of the CHARMM additive force field for DNA:  
Improved treatment of the BI/BII conformational  
equilibrium.**

Katarina Hart<sup>1</sup>, Nicolas Foloppe<sup>2</sup>, Christopher M. Baker,<sup>3</sup> Elizabeth J. Denning,<sup>3</sup> Lennart Nilsson<sup>1\*</sup> and Alexander D. MacKerell Jr.<sup>3\*</sup>

<sup>1</sup>Department of Biosciences and Nutrition, Center for Biosciences, Karolinska Institutet, SE-141 83 HUDDINGE, Sweden

<sup>2</sup>51 Natal Road, Cambridge CB1 3NY, UK

<sup>3</sup>Department of Pharmaceutical Sciences, School of Pharmacy, University of Maryland, 20 Penn Street, Baltimore, Maryland 21201, USA

\*Corresponding authors: Lennart.Nilsson@ki.se, alex@outerbanks.umaryland.edu

*Running title: CHARMM DNA force field optimization*

*Keywords: nucleic acids, RNA, empirical force field, quantum mechanics, EcorRI dodecamer, oligonucleotide, A-DNA, B-DNA, Z-DNA, crystal survey*

Table S1) Modified dihedral parameters .

| $\epsilon$ :C2'-C3'-O3'-P <sup>1</sup>       | $K_{\nu}$ | n | $\delta$ |
|----------------------------------------------|-----------|---|----------|
| C27                                          |           |   |          |
| CN8-CN7-ON2-P                                | 2.5       | 1 | 180      |
| C27_1                                        |           |   |          |
| CN8-CN7-ON2-P                                | 1.7       | 1 | 180      |
| C27_2                                        |           |   |          |
| CN8-CN7-ON2-P                                | 2.1       | 1 | 180      |
| C27_2 with C27_2b C2'-C3'-C4'-O4' parameters |           |   |          |
| CN8-CN7-ON2-P2                               | 1.9       | 1 | 180      |
| C27_3                                        |           |   |          |
| CN8-CN7-ON2-P                                | 2.2       | 1 | 180      |
| CN8-CN7-ON2-P                                | 0.7       | 2 | 180      |
| $\zeta$ :C3'-O3'-P-O5' <sup>1</sup>          |           |   |          |
| C27                                          |           |   |          |
| ON2-P2-ON2-CN7                               | 1.2       | 1 | 180      |
| ON2-P2-ON2-CN7                               | 0.1       | 2 | 180      |
| ON2-P2-ON2-CN7                               | 0.1       | 3 | 180      |
| C27_1                                        |           |   |          |
| Same_as_C27                                  |           |   |          |
| C27_2                                        |           |   |          |
| ON2-P2-ON2-CN7                               | 0.9       | 1 | 180      |
| ON2-P2-ON2-CN7                               | 0.4       | 2 | 180      |
| ON2-P2-ON2-CN7                               | 0.2       | 3 | 180      |
| C27_3                                        |           |   |          |
| Same_as_C27                                  |           |   |          |
| Sugar pucker: C2'-C3'-C4'-O4' <sup>1</sup>   |           |   |          |
| C27                                          |           |   |          |
| CN8-CN7-CN7-ON6                              | 0.0       | 3 | 0        |
| C27_2b and C27_3b                            |           |   |          |
| CN8-CN7-CN7-ON6                              | 1.0       | 4 | 0        |
| CN8-CN7-CN7-ON6                              | 0.3       | 5 | 180      |
| CN8-CN7-CN7-ON6                              | 0.3       | 6 | 180      |

1) Atom naming in the header lines is the standard nomenclature for DNA[1] while the names associated with the parameters are the CHARMM atom type names. Note that in the final model (CHARMM36) the P atom type name was changed to P2 to avoid a conflict in the  $\zeta$  parameters with those in RNA.

2)  $K_{\nu}$ , n, and  $\delta$  are the force constant (kcal/mol), multiplicity or periodicity and phase angle associated with the dihedral term in the potential energy function.

Table S2a) Average percent BII as a function of residue for JunFos from <sup>31</sup>P NMR experiments and the simulations.

| Base Step                               | Exper | C27    |      | C27_2b  |      | Amber bsc0 |      |
|-----------------------------------------|-------|--------|------|---------|------|------------|------|
|                                         |       | Ave    | Diff | Ave     | Diff | Ave        | Diff |
| 5'-G <sub>1</sub> pC <sub>2</sub>       | 22    | 20±1.3 | -2   | 50±6.2  | 28   | 30±6.6     | 8    |
| <b>C<sub>2</sub>pA<sub>3</sub></b>      | 69    | 6±0.2  | -63  | 30±5.4  | -39  | 10±2.3     | -59  |
| A <sub>3</sub> pT <sub>4</sub>          | 0     | 0±0.1  | 0    | 2±0.7   | 2    | 3±1.4      | 3    |
| T <sub>4</sub> pT <sub>5</sub>          | 22    | 1±0.3  | -21  | 2±0.3   | -20  | 1±1.1      | -21  |
| T <sub>5</sub> pC <sub>6</sub>          | 13    | 2±0.2  | -11  | 8±0.5   | -5   | 2±0.6      | -11  |
| C <sub>6</sub> pT <sub>7</sub>          | 13    | 1±0.1  | -12  | 6±0.3   | -7   | 0±0.2      | -13  |
| <b>T<sub>7</sub>pG<sub>8</sub></b>      | 37    | 8±1.3  | -29  | 21±2    | -16  | 2±0.7      | -35  |
| <b>G<sub>8</sub>pA<sub>9</sub></b>      | 49    | 12±1.7 | -37  | 37±1.8  | -12  | 46±3.1     | -3   |
| A <sub>9</sub> pG <sub>10</sub>         | 26    | 1±0.2  | -25  | 7±0.8   | -19  | 7±4.1      | -19  |
| G <sub>10</sub> pT <sub>11</sub>        | 0     | 1±0.3  | 1    | 9±1.7   | 9    | 2±1.0      | 2    |
| T <sub>11</sub> pC <sub>12</sub>        | 9     | 6±2.6  | -3   | 21±2.8  | 12   | 1±0.1      | -8   |
| <b>C<sub>12</sub>pA<sub>13</sub></b>    | 80    | 7±2.5  | -73  | 31±9.5  | -49  | 2±0.7      | -78  |
| A <sub>13</sub> pG <sub>14-3'</sub>     | 42    | 20±8.1 | -22  | 56±12.7 | 14   | 5±4.1      | -37  |
| 5'-C <sub>15</sub> pT <sub>16</sub>     | 23    | 29±4.9 | 6    | 62±3.2  | 39   | 1±0.5      | -22  |
| <b>T<sub>16</sub>pG<sub>17</sub></b>    | 52    | 23±5.7 | -29  | 44±6.7  | -8   | 7±2.5      | -45  |
| <b>G<sub>17</sub>pA<sub>18</sub></b>    | 50    | 28±9.3 | -22  | 61±5.9  | 11   | 63±4.4     | 13   |
| A <sub>18</sub> pC <sub>19</sub>        | 29    | 1±0.3  | -28  | 13±3.2  | -16  | 1±0.2      | -28  |
| C <sub>19</sub> pT <sub>20</sub>        | 0     | 4±0.8  | 4    | 11±1.0  | 11   | 1±0.5      | 1    |
| T <sub>20</sub> pC <sub>21</sub>        | 2     | 2±0.2  | 0    | 10±1.0  | 8    | 1±0.2      | -1   |
| <b>C<sub>21</sub>pA<sub>22</sub></b>    | 85    | 4±0.5  | -81  | 20±3.3  | -65  | 2±0.3      | -83  |
| A <sub>22</sub> pG <sub>23</sub>        | 28    | 8±0.5  | -20  | 21±1.7  | -7   | 33±6.0     | 5    |
| <b>G<sub>23</sub>pA<sub>24</sub></b>    | 32    | 16±1.0 | -16  | 37±1.2  | 5    | 17±3.0     | -15  |
| A <sub>24</sub> pA <sub>25</sub>        | 13    | 1±0.1  | -12  | 6±0.5   | -7   | 5±1.1      | -8   |
| A <sub>25</sub> pT <sub>26</sub>        | 0     | 1±0.1  | 1    | 6±0.5   | 6    | 0±1.1      | 0    |
| <b>T<sub>26</sub>pG<sub>27</sub></b>    | 26    | 4±0.4  | -22  | 9±2.0   | -17  | 2±0.7      | -24  |
| <b>G<sub>27</sub>pC<sub>28-3'</sub></b> | 66    | 4±0.5  | -62  | 35±13.7 | -31  | 10±2.0     | -56  |
| Average                                 | 30    | 8±1.7  | -22  | 24±3.4  | -7   | 10±1.9     | -20  |
| Correlation                             |       | 0.30   |      | 0.49    |      | 0.26       |      |

Results obtained over 100 ns simulations. Statistical analysis for the individual base steps accounting for the symmetry of the sequence based on 5 20 ns blocks from which the averages and standard deviations were calculated with the errors for the average differences are the standard error over all the base steps. Correlations are between the experimental and average simulation values over the base steps. Experimental data from Heddi et al.[2]

Table 2b) Average percent BII as a function of residue for NF- $\kappa$ b from  $^{31}\text{P}$  NMR experiments and the simulation.

| Base Step  | Exper | C27        |      | C27_2b      |      |
|------------|-------|------------|------|-------------|------|
|            |       | Ave        | Diff | Ave         | Diff |
| 5'-G1pA2   | 32    | 47 $\pm$ 2 | 15   | 88 $\pm$ 2  | 56   |
| A2pC3      | 58    | 2 $\pm$ 0  | -56  | 15 $\pm$ 2  | -43  |
| C3pT4      | 0     | 4 $\pm$ 2  | 4    | 20 $\pm$ 3  | 20   |
| T4pT5      | 12    | 0 $\pm$ 0  | -12  | 1 $\pm$ 0   | -11  |
| T5pT6      | 0     | 1 $\pm$ 0  | 1    | 2 $\pm$ 0   | 2    |
| T6pC7      | 16    | 4 $\pm$ 0  | -12  | 10 $\pm$ 1  | -6   |
| C7pC8      | 32    | 2 $\pm$ 0  | -30  | 17 $\pm$ 1  | -15  |
| C8pA9      | 75    | 5 $\pm$ 1  | -70  | 28 $\pm$ 3  | -47  |
| A9pG10     | 28    | 4 $\pm$ 1  | -24  | 32 $\pm$ 2  | 4    |
| G10pG11-3' | 59    | 18 $\pm$ 7 | -41  | 64 $\pm$ 11 | 5    |
| 5'-C14pC15 | 34    | 20 $\pm$ 1 | -14  | 67 $\pm$ 3  | 33   |
| C15pT16    | 11    | 2 $\pm$ 7  | -9   | 29 $\pm$ 7  | 18   |
| T16pG17    | 42    | 3 $\pm$ 12 | -39  | 35 $\pm$ 11 | -7   |
| G17pG18    | 42    | 6 $\pm$ 1  | -36  | 37 $\pm$ 6  | -5   |
| G18pA19    | 36    | 8 $\pm$ 1  | -28  | 32 $\pm$ 7  | -4   |
| A19pA20    | 2     | 3 $\pm$ 0  | 1    | 10 $\pm$ 4  | 8    |
| A20pA21    | 12    | 3 $\pm$ 1  | -9   | 9 $\pm$ 2   | -3   |
| A21pG22    | 38    | 2 $\pm$ 0  | -36  | 8 $\pm$ 1   | -30  |
| G22pT23    | 0     | 2 $\pm$ 1  | 2    | 8 $\pm$ 1   | 8    |
| T23pC24-3' | 59    | 5 $\pm$ 0  | -54  | 38 $\pm$ 1  | -21  |
| Average    | 29    | 7 $\pm$ 2  | -22  | 28 $\pm$ 3  | -2   |
| Correl     |       | 0.20       |      | 0.45        |      |

Results obtained over 100 ns simulations. Statistical analysis for the individual base steps accounting for the symmetry of the sequence based on 5 20 ns blocks from which the averages and standard deviations were calculated with the errors for the average differences are the standard error over all the base steps. Correlations are between the experimental and average simulation values over the base steps. Experimental data obtained using the method of Heddi et al.[2] (Brigitte Hartmann, Personal Communication).

Table S3) Order parameters,  $S^2$ , for EcoRI from NMR experiments and excess MD simulation using C27\_2b. Results from the simulations are presented individually for strand 1 (s1) and strand 2 (s2).

| C1' atom<br>Base     | Exper |      | C27_2b/high salt |       |
|----------------------|-------|------|------------------|-------|
|                      | $S^2$ | SD   | s1               | s2    |
| 1                    | 0.52  | 0.02 | 0.45             | 0.57  |
| 2                    | 0.78  | 0.03 | 0.75             | 0.78  |
| 3                    | 0.74  | 0.03 | 0.56             | 0.59  |
| 4                    | 0.88  | 0.03 | 0.81             | 0.80  |
| 5                    | 0.84  | 0.03 | 0.80             | 0.88  |
| 6                    | N.A.  | N.A. | 0.56             | 0.60  |
| 7                    | 0.92  | 0.02 | 0.67             | 0.66  |
| 8                    | 0.86  | 0.02 | 0.81             | 0.76  |
| 9                    | 0.68  | 0.03 | 0.60             | 0.55  |
| 10                   | 0.85  | 0.02 | 0.82             | 0.81  |
| 11                   | 0.71  | 0.02 | 0.63             | 0.65  |
| 12                   | N.A.  | N.A. | 0.70             | 0.68  |
| Difference Analysis  |       |      |                  |       |
| Average_all          |       |      | -0.09            | -0.07 |
| Correlation          |       |      | 0.84             | 0.70  |
| Average_non_terminal |       |      | -0.09            | -0.08 |
| Correlation          |       |      | 0.70             | 0.64  |
| C3' atom<br>Base     | Exper |      | C27_2b/high salt |       |
|                      | $S^2$ | SD   | s1               | s2    |
| 1                    | 0.39  | 0.02 | 0.51             | 0.58  |
| 2                    | N.A.  | N.A. | 0.75             | 0.80  |
| 3                    | N.A.  | N.A. | 0.50             | 0.52  |
| 4                    | N.A.  | N.A. | 0.81             | 0.82  |
| 5                    | 0.90  | 0.02 | 0.76             | 0.89  |
| 6                    | 0.79  | 0.03 | 0.35             | 0.41  |
| 7                    | N.A.  | N.A. | 0.46             | 0.47  |
| 8                    | 0.79  | 0.03 | 0.78             | 0.65  |
| 9                    | 0.67  | 0.04 | 0.50             | 0.40  |
| 10                   | N.A.  | N.A. | 0.82             | 0.78  |
| 11                   | N.A.  | N.A. | 0.58             | 0.62  |
| 12                   | 0.43  | 0.05 | 0.64             | 0.63  |
| Difference Analysis  |       |      |                  |       |
| Average_all          |       |      | -0.11            | -0.11 |
| Correlation          |       |      | 0.24             | 0.25  |
| Average_non_terminal |       |      | -0.19            | -0.20 |
| Correlation          |       |      | 0.47             | 0.84  |

Table S3 continued

| C6/C8 atoms<br>Base  | Exper          |      | C27_2b/high salt |       |
|----------------------|----------------|------|------------------|-------|
|                      | S <sup>2</sup> | SD   | s1               | s2    |
| 1                    | 0.77           | 0.04 | 0.57             | 0.72  |
| 2                    | 0.81           | 0.07 | 0.86             | 0.86  |
| 3                    | 0.92           | 0.04 | 0.84             | 0.85  |
| 4                    | N.A.           | N.A. | 0.88             | 0.89  |
| 5                    | N.A.           | N.A. | 0.90             | 0.90  |
| 6                    | N.A.           | N.A. | 0.90             | 0.90  |
| 7                    | 0.83           | 0.02 | 0.86             | 0.86  |
| 8                    | 0.87           | 0.04 | 0.85             | 0.85  |
| 9                    | 0.79           | 0.06 | 0.85             | 0.85  |
| 10                   | 0.88           | 0.04 | 0.88             | 0.88  |
| 11                   | 0.88           | 0.04 | 0.82             | 0.81  |
| 12                   | 0.91           | 0.08 | 0.80             | 0.78  |
| Difference Analysis  |                |      |                  |       |
| Average_all          |                |      | -0.04            | -0.02 |
| Correlation          |                |      | 0.47             | 0.27  |
| Average_non_terminal |                |      | -0.01            | -0.02 |
| Correlation          |                |      | -0.15            | -0.08 |

Analysis over the 5 to 100 ns portions of the trajectories. Difference and correlation coefficient calculated over all nucleotides for which experimental data is available and excluding the data for the terminal nucleotides.

Figure S1) RMS difference versus time for 1ZF1 for C27 (black) and C27\_2b (red) from MD simulations in a 75 % ethanol solution (A, B) or aqueous solution (C, D) versus the canonical A (A, C) and B (B, D) forms of DNA.

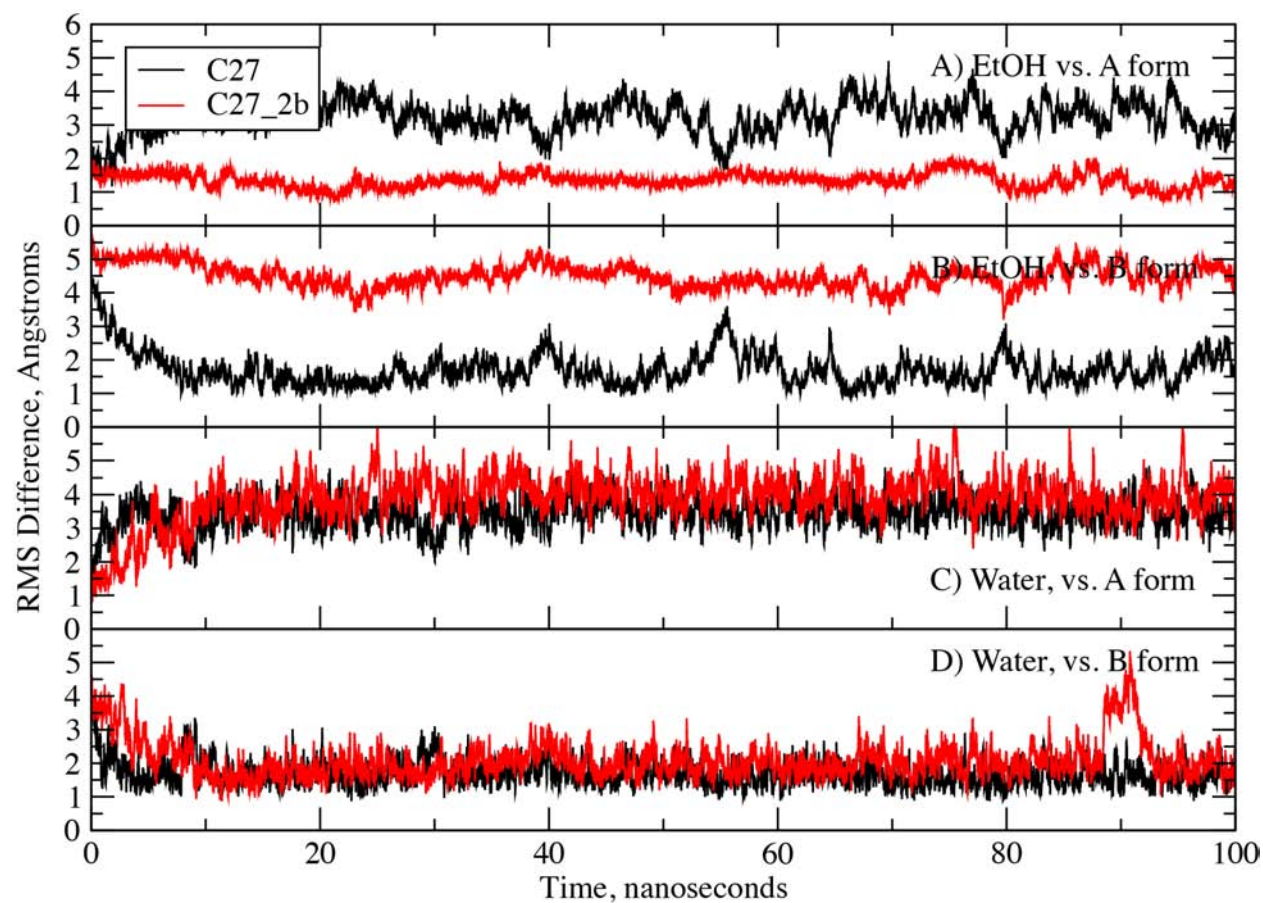

Figure S2) A) BII population from the JunFos C27\_2b simulation calculated using simple counting of BI and BII states as performed in the MD analysis versus the interpolation method based on the average difference between  $\epsilon$  and  $\zeta$ , analogous to that performed in the  $^{31}\text{P}$  NMR experimental estimates of BII. B) Correlation between the BII populations from the counting and interpolation methods from the C27\_2b simulation.

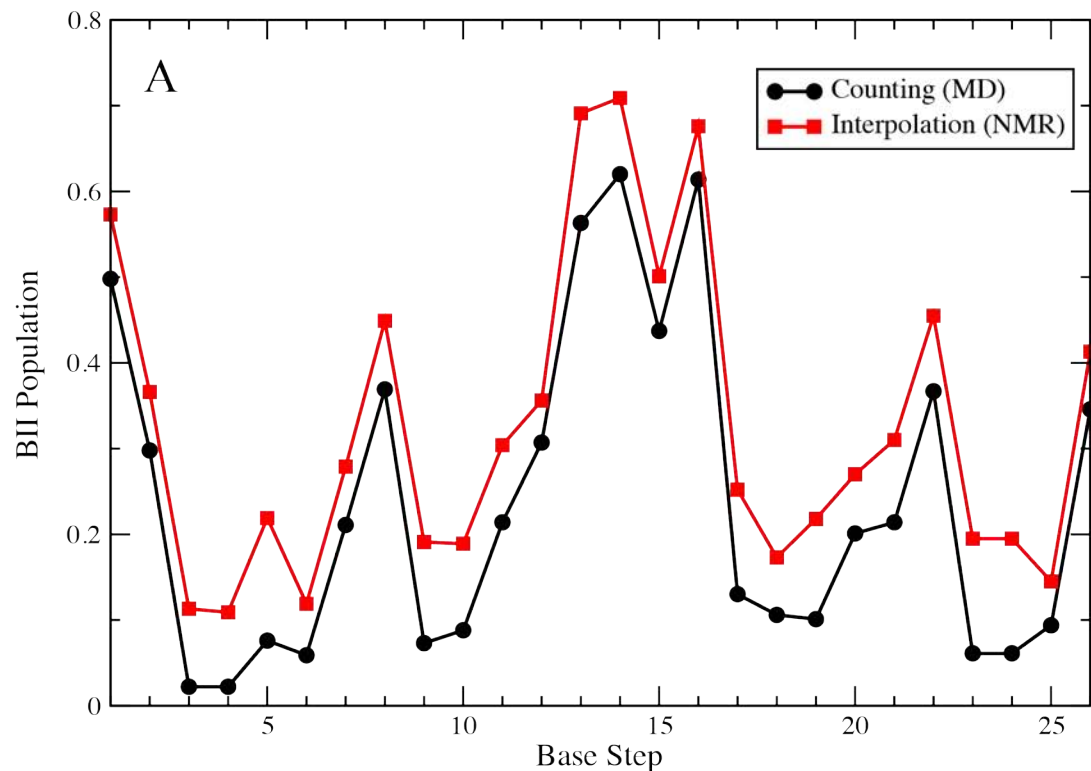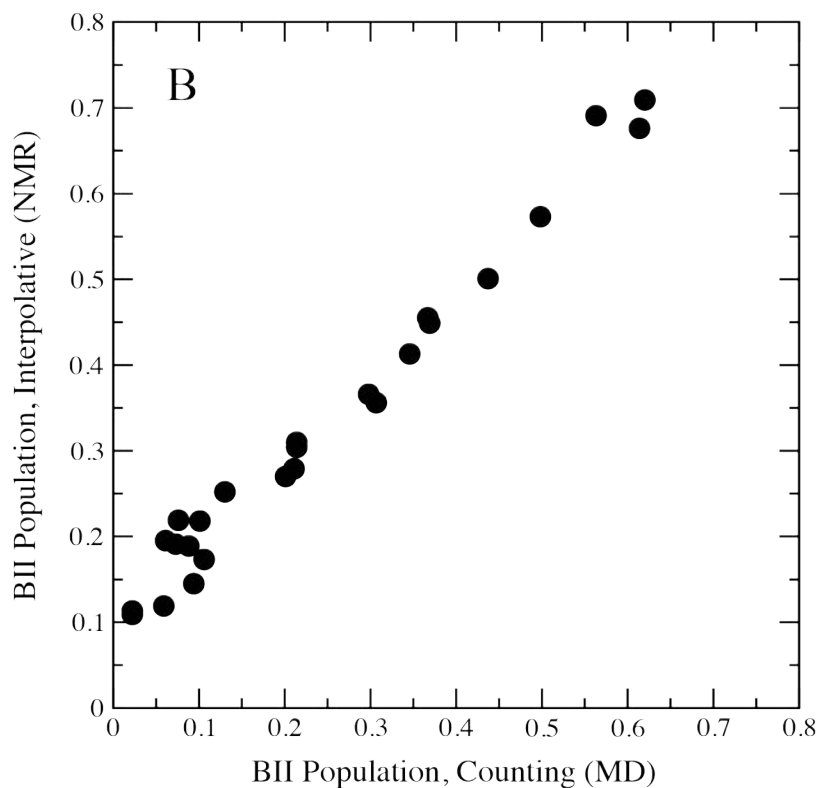



Figure S3) RMS fluctuations as a function of nucleotide from simulations of the 1ZF7 (A, B, C) and 3BSE (D, E, F) duplexes for all non-hydrogen atoms (A, C), the backbone (phosphate and sugar) non-hydrogen atoms (B, E) and the base non-hydrogen atoms (C, F).

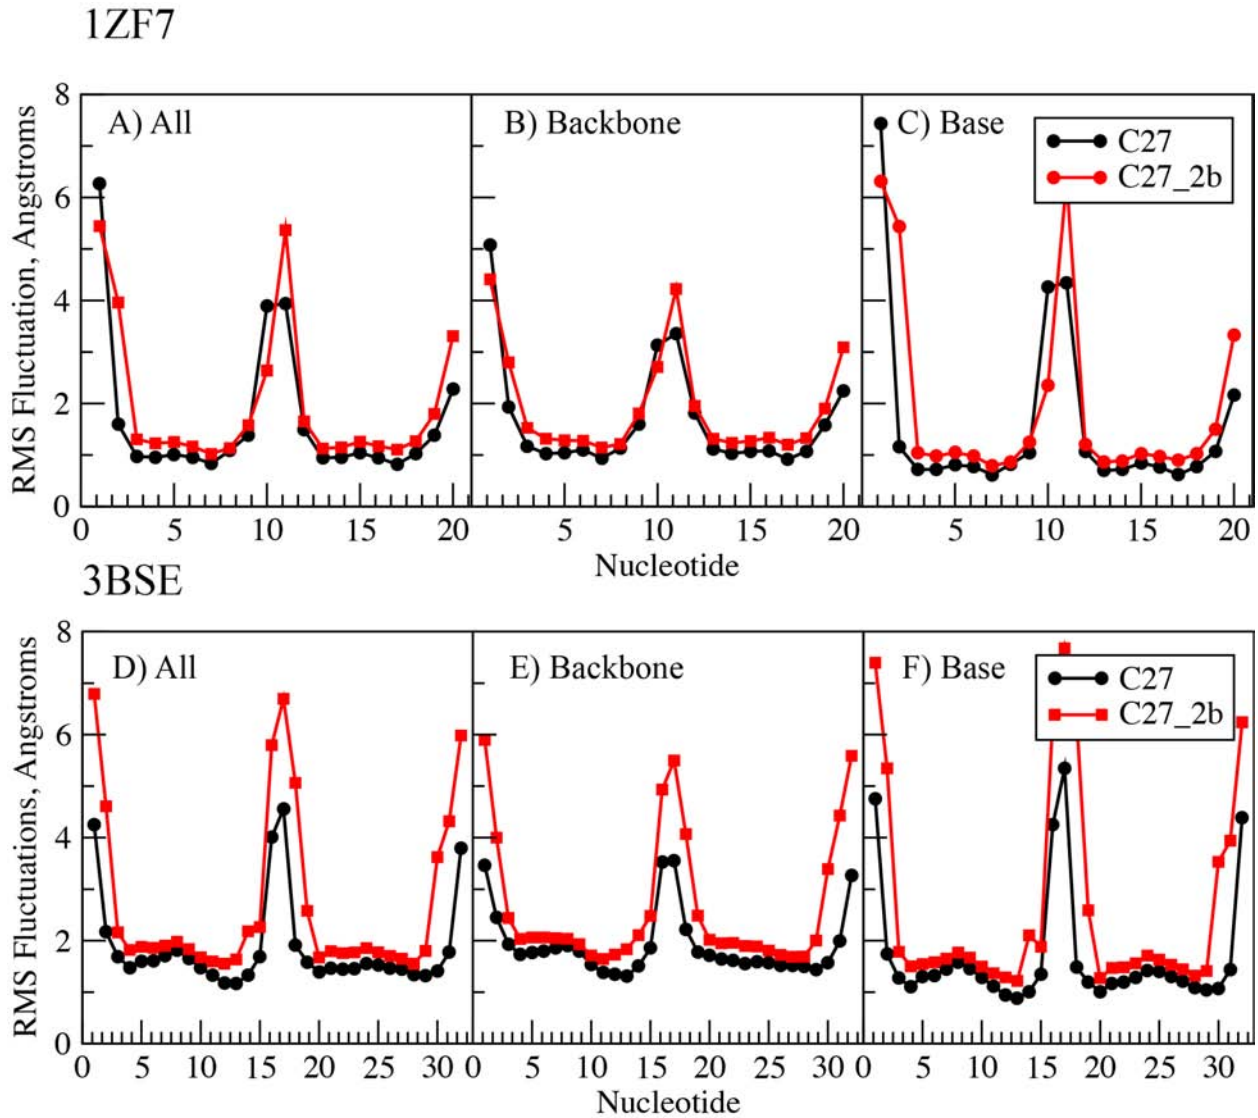

Figure S4) Dihedral and sugar pucker probability distributions from MD simulations using C27 (black) and C27\_2b (red) of A) 1ZF7, B) 3BSE, C) 1ZF1 in 75% ethanol and D) 1LJX crystal. Data from a survey of the crystallographic structures (blue) is included for B form structures in A and B and A form structures in C

S4a)

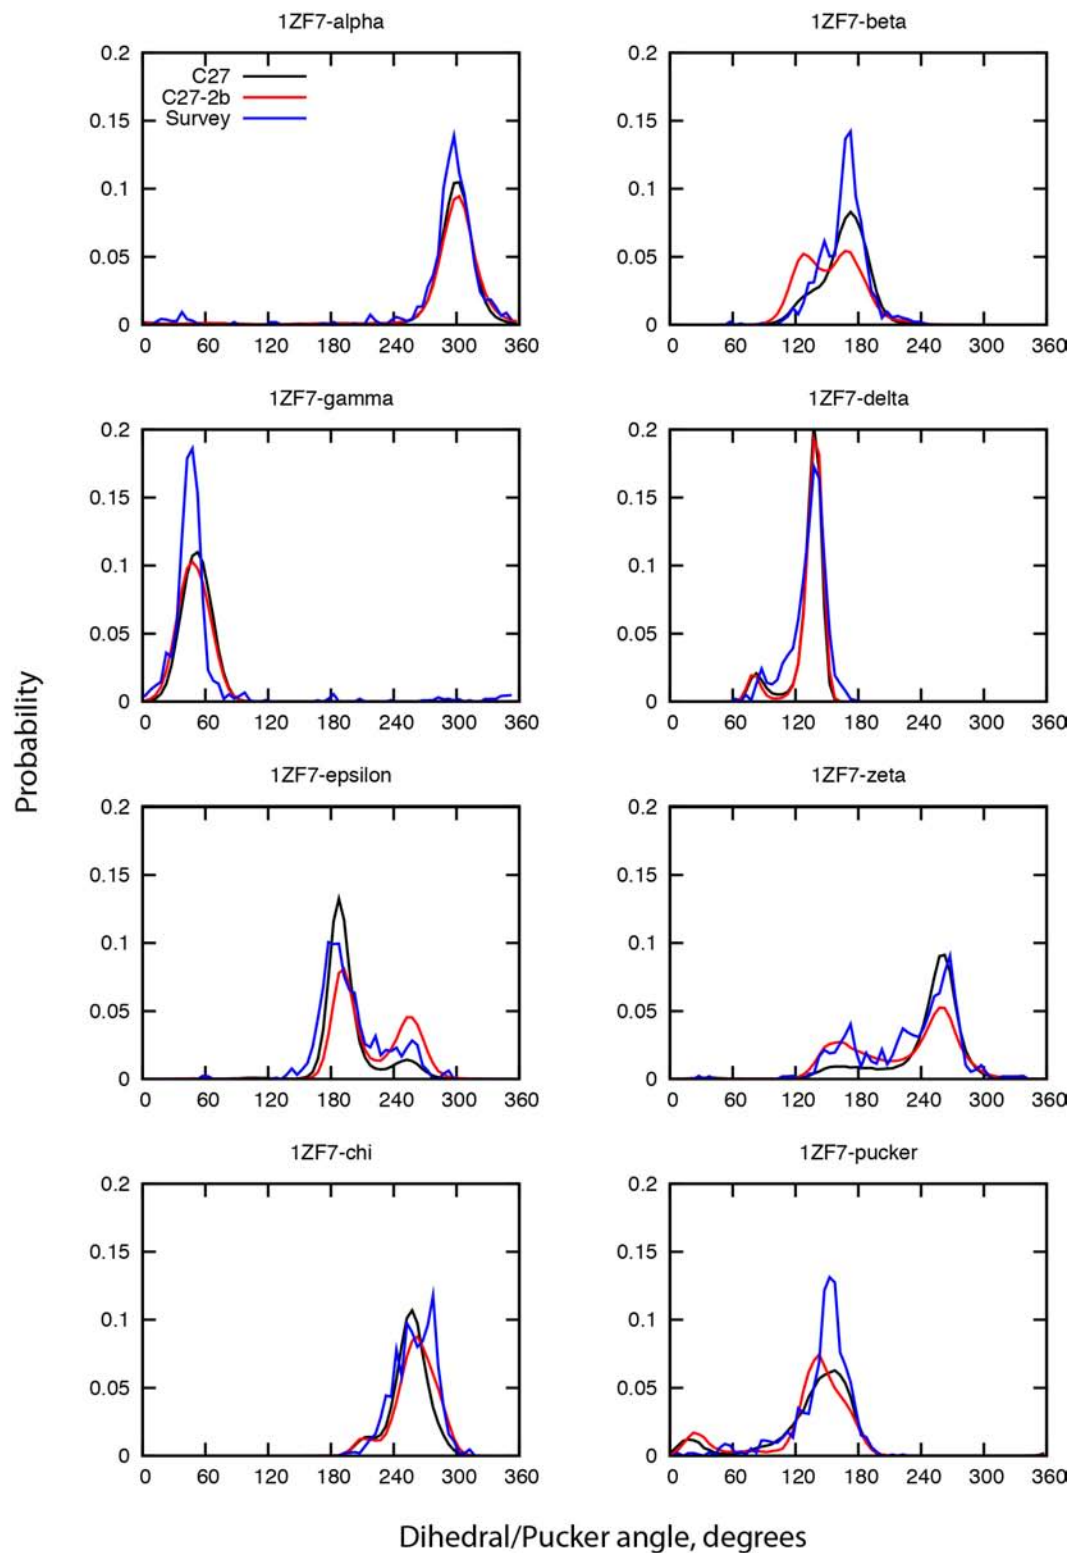

S4b)

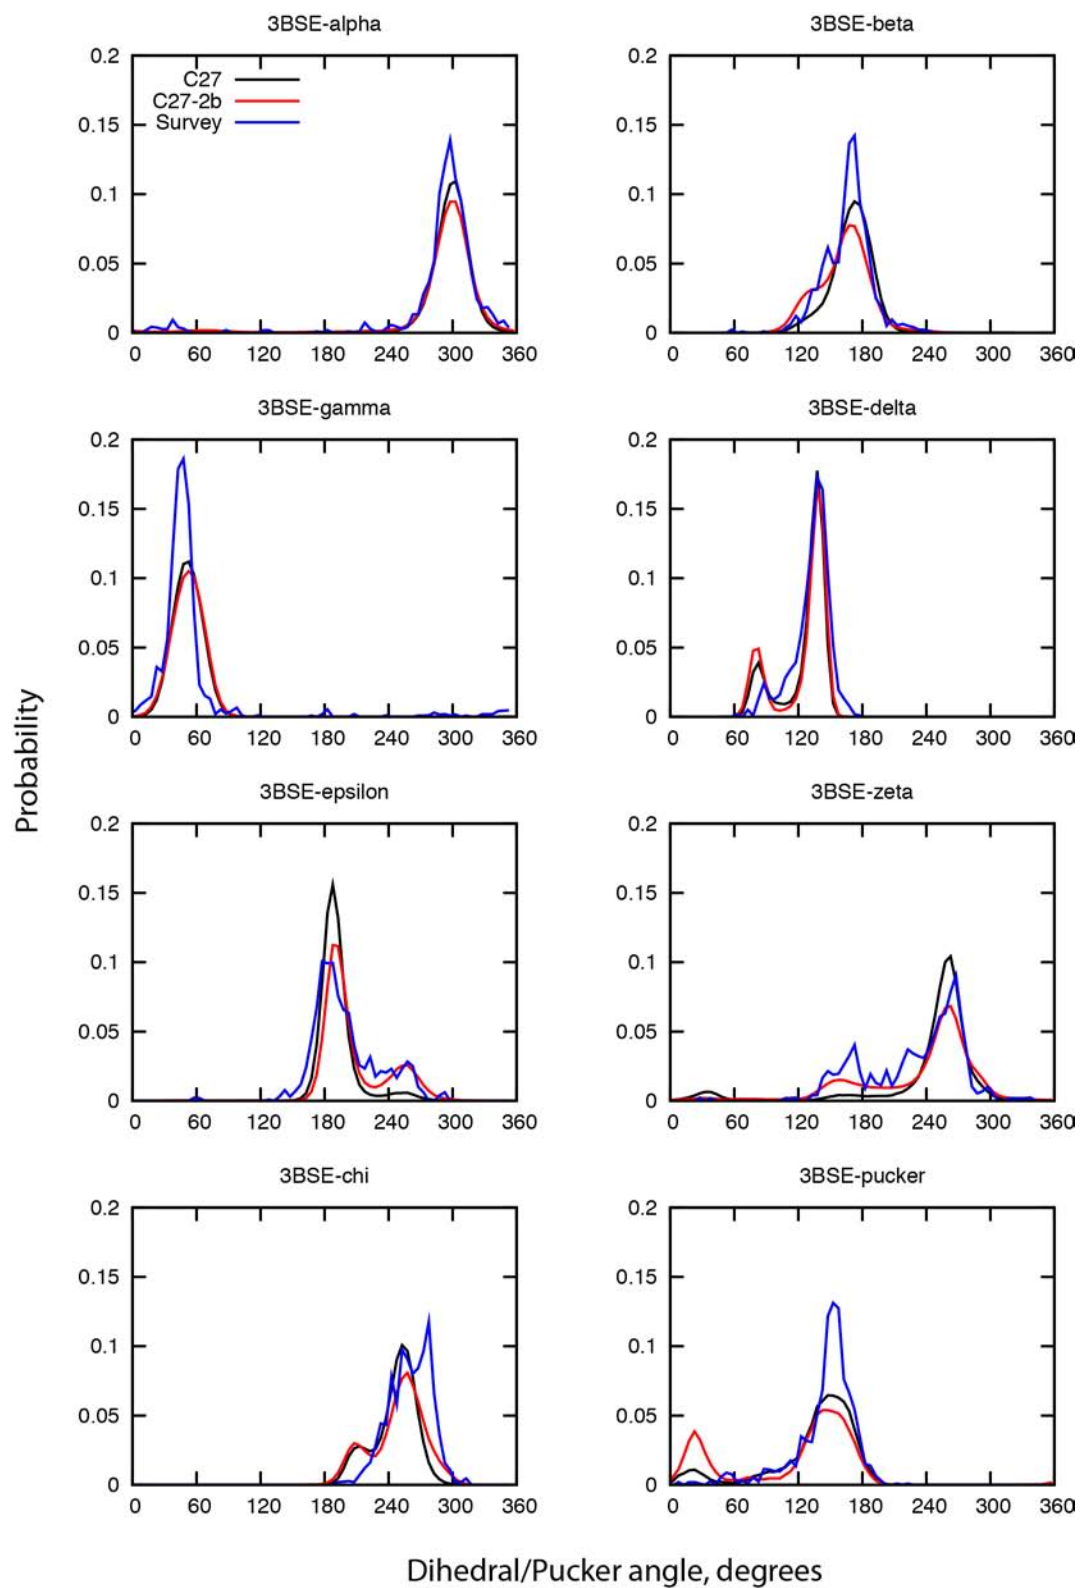

S4c)

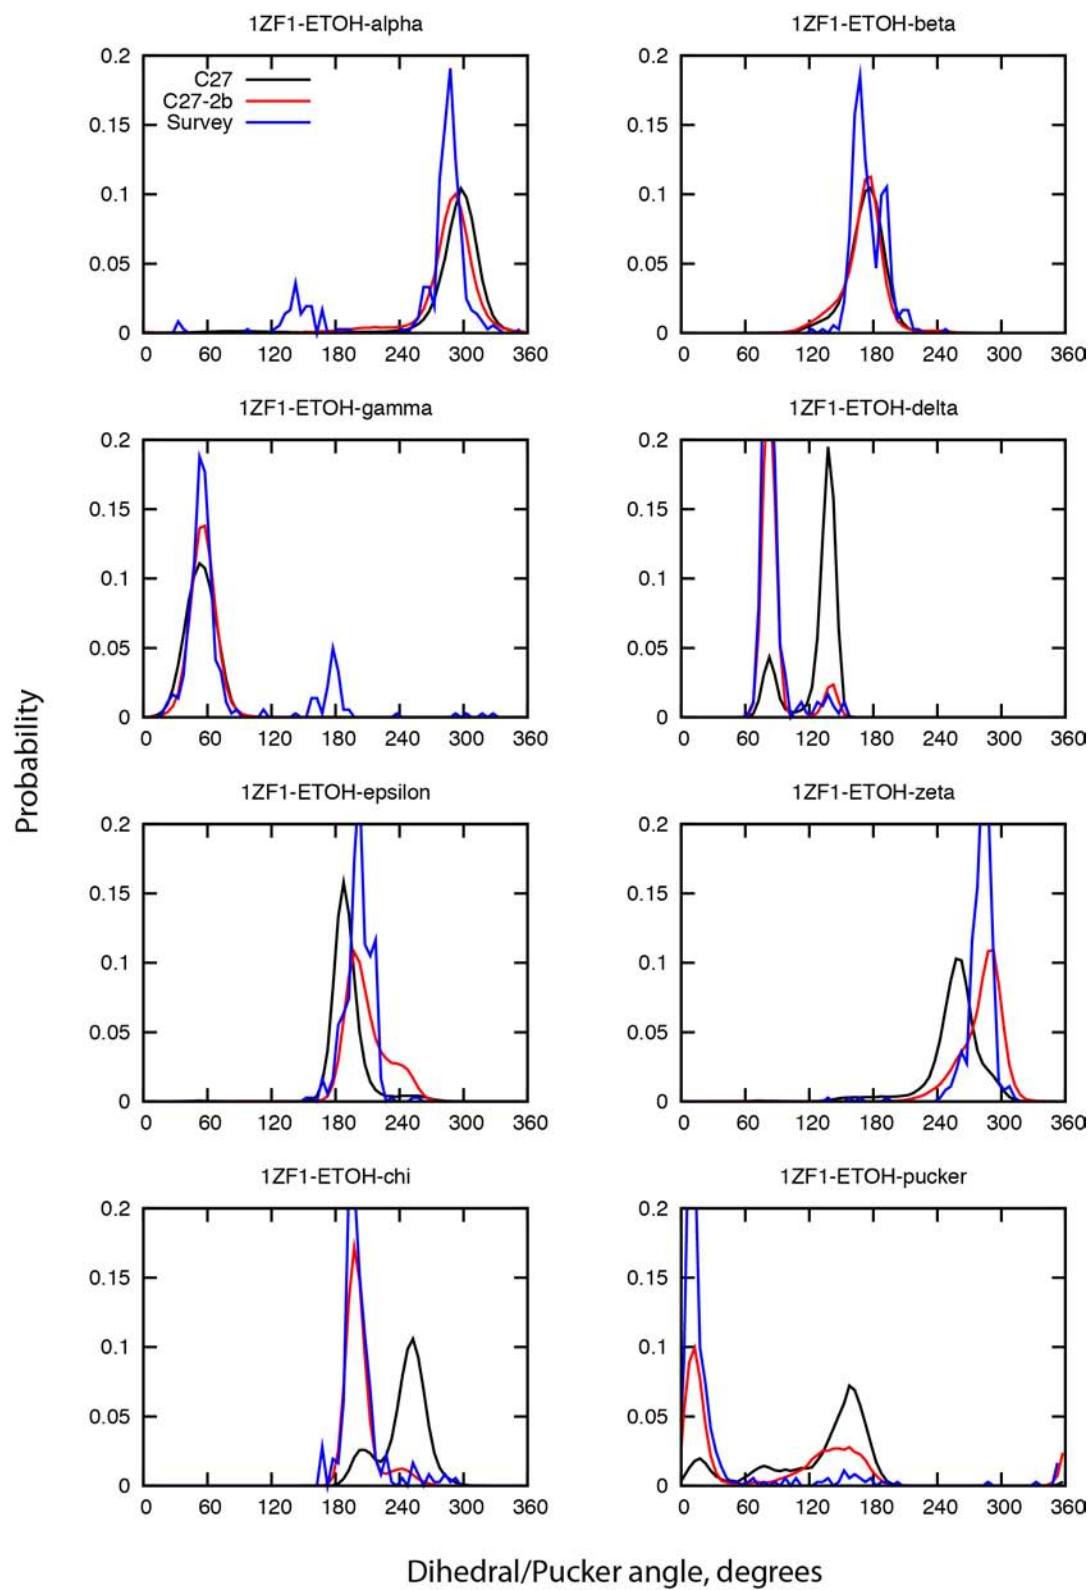

S4d) 1LJX

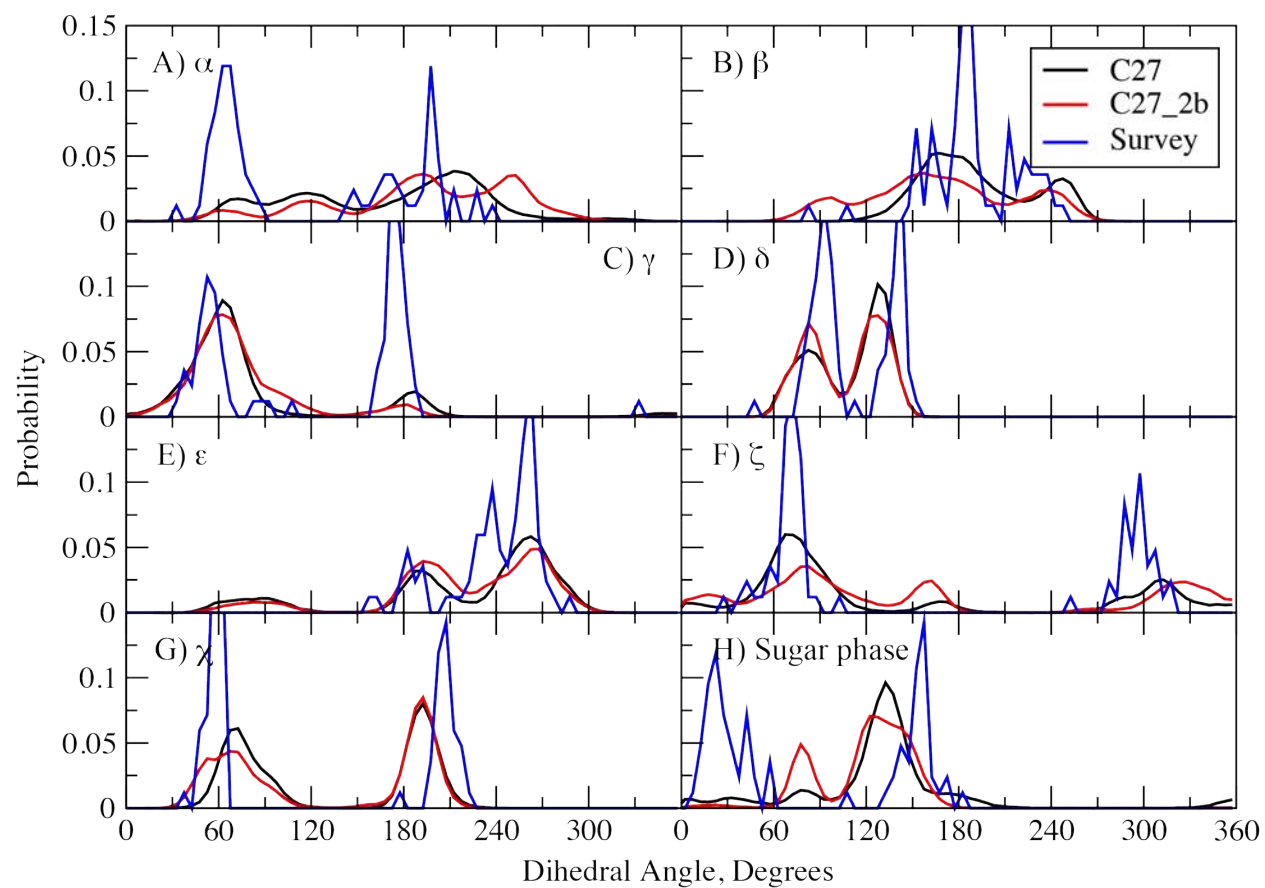



Figure S5) Time series of the sugar pucker phase angles from the C27\_2b MD simulation of EcoRI. Values presented at 100 ps intervals for the individual nucleotides. Upper and lower panels represent strands 1 and 2, respectively.

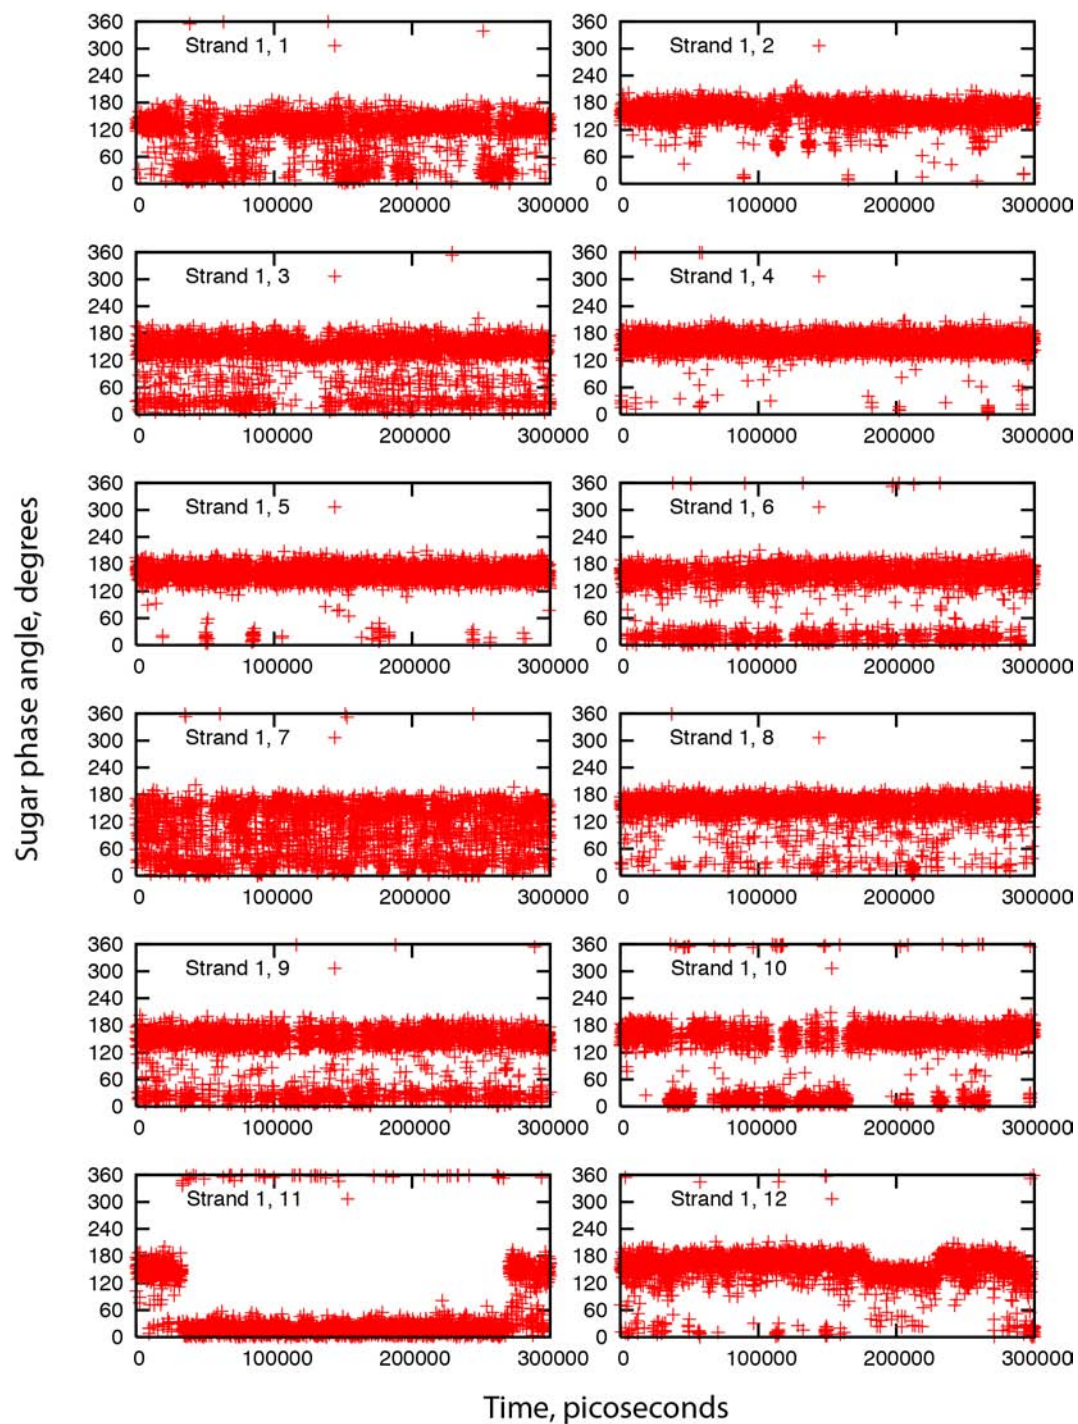

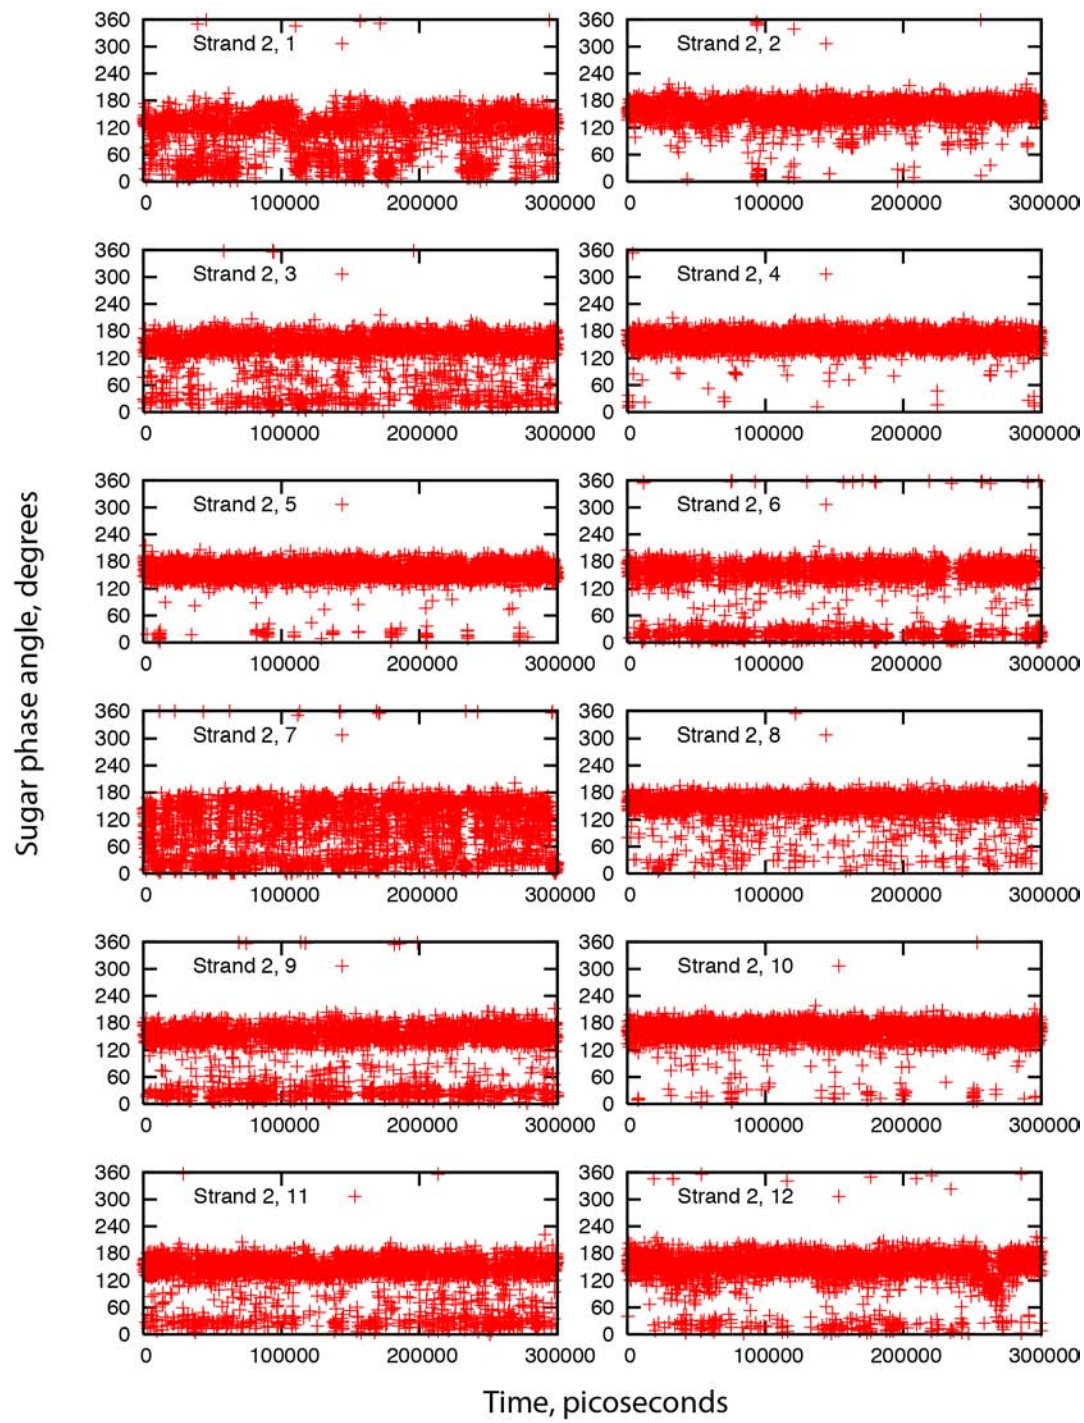



Figure S6) Time series of the epsilon dihedral angle from the C27\_2b MD simulation of EcoRI. Values presented at 100 ps intervals. Upper and lower panels represent strands 1 and 2, respectively. Note that in the BI state  $\epsilon$  is approximately  $190^\circ$  in the BII state it is approximately  $270^\circ$ .

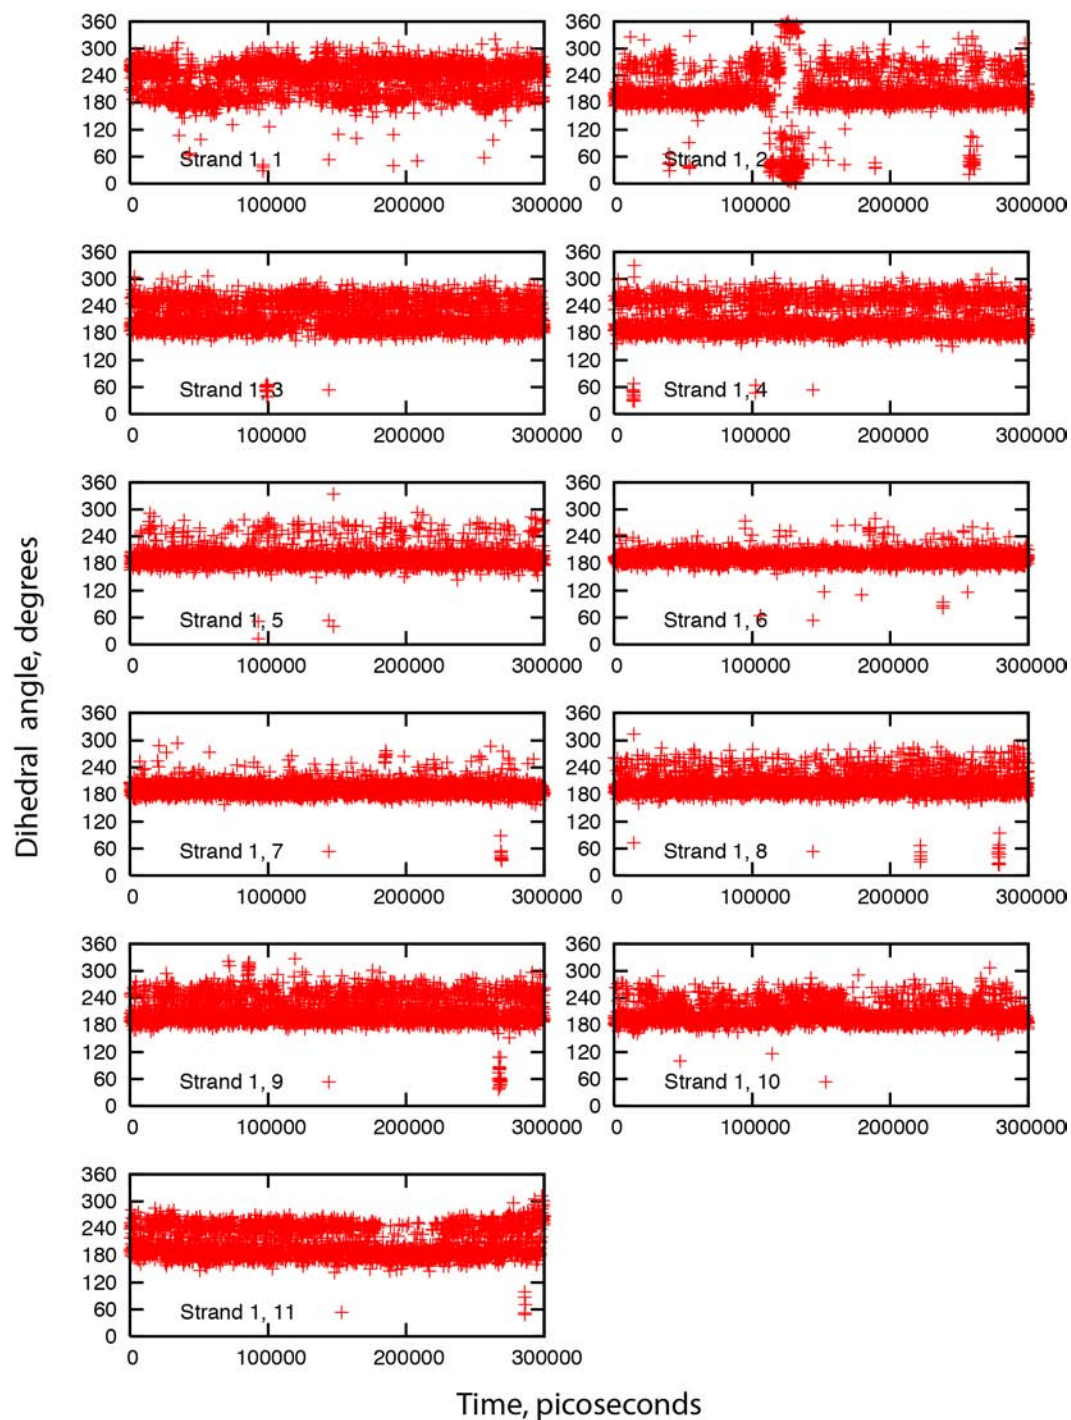



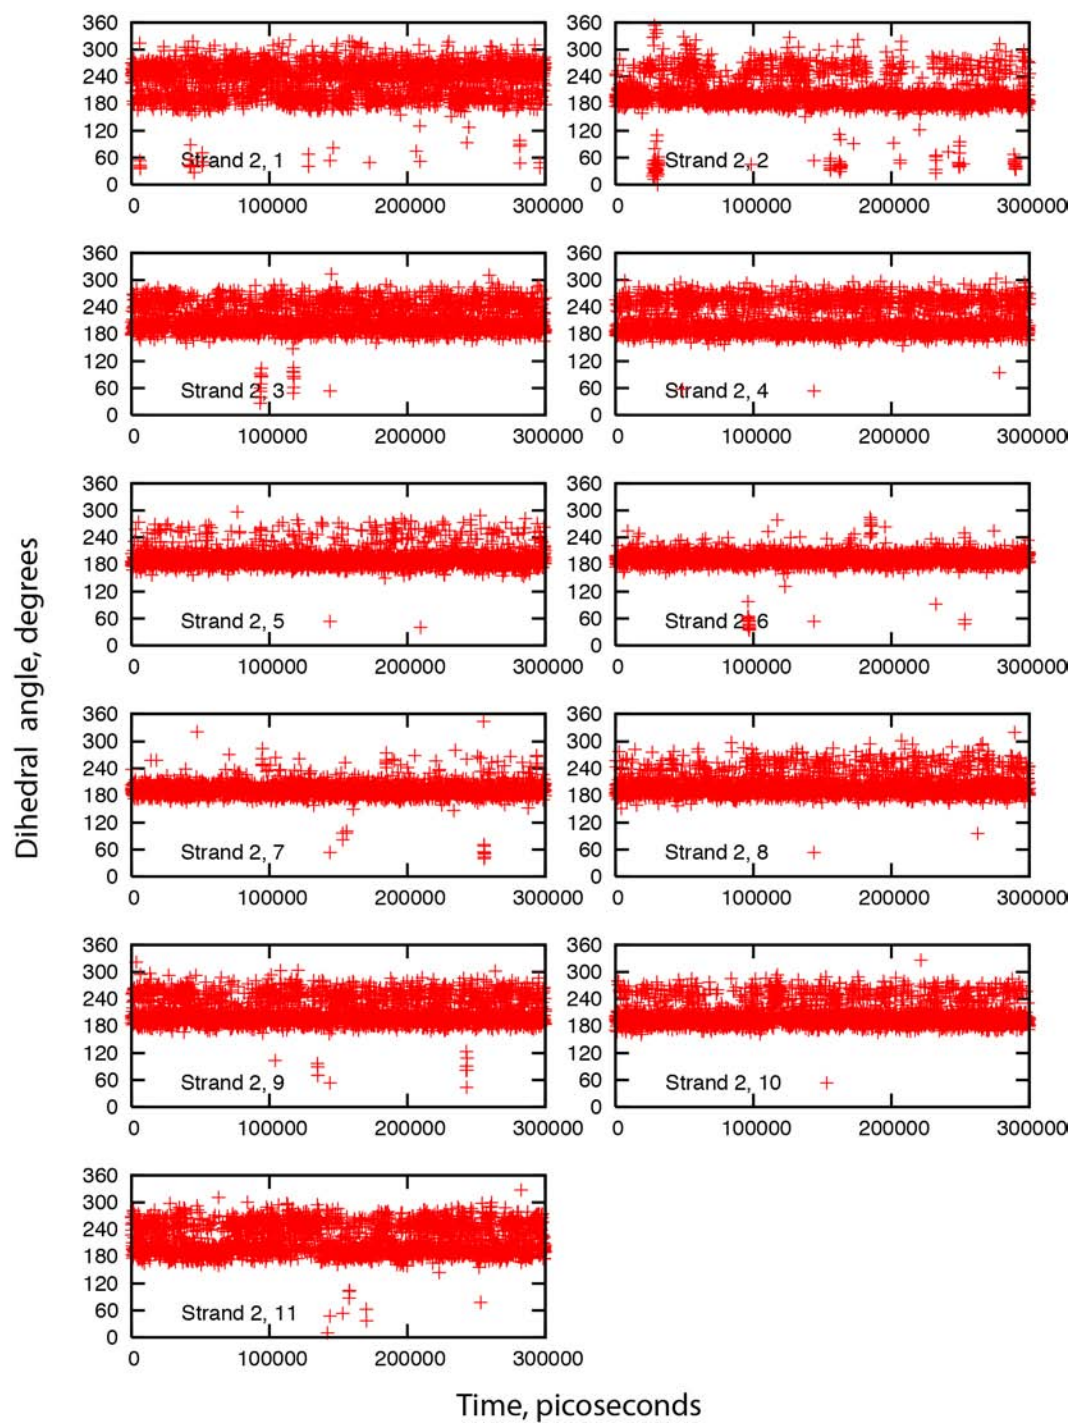

Figure S7) Time series of the zeta dihedral angle from the C27\_2b MD simulation of EcoRI. Values presented at 100 ps intervals. Upper and lower panels represent strands 1 and 2, respectively. Note that in the BI state  $\zeta$  is approximately  $270^\circ$  and in the BII state it is approximately  $180^\circ$ .

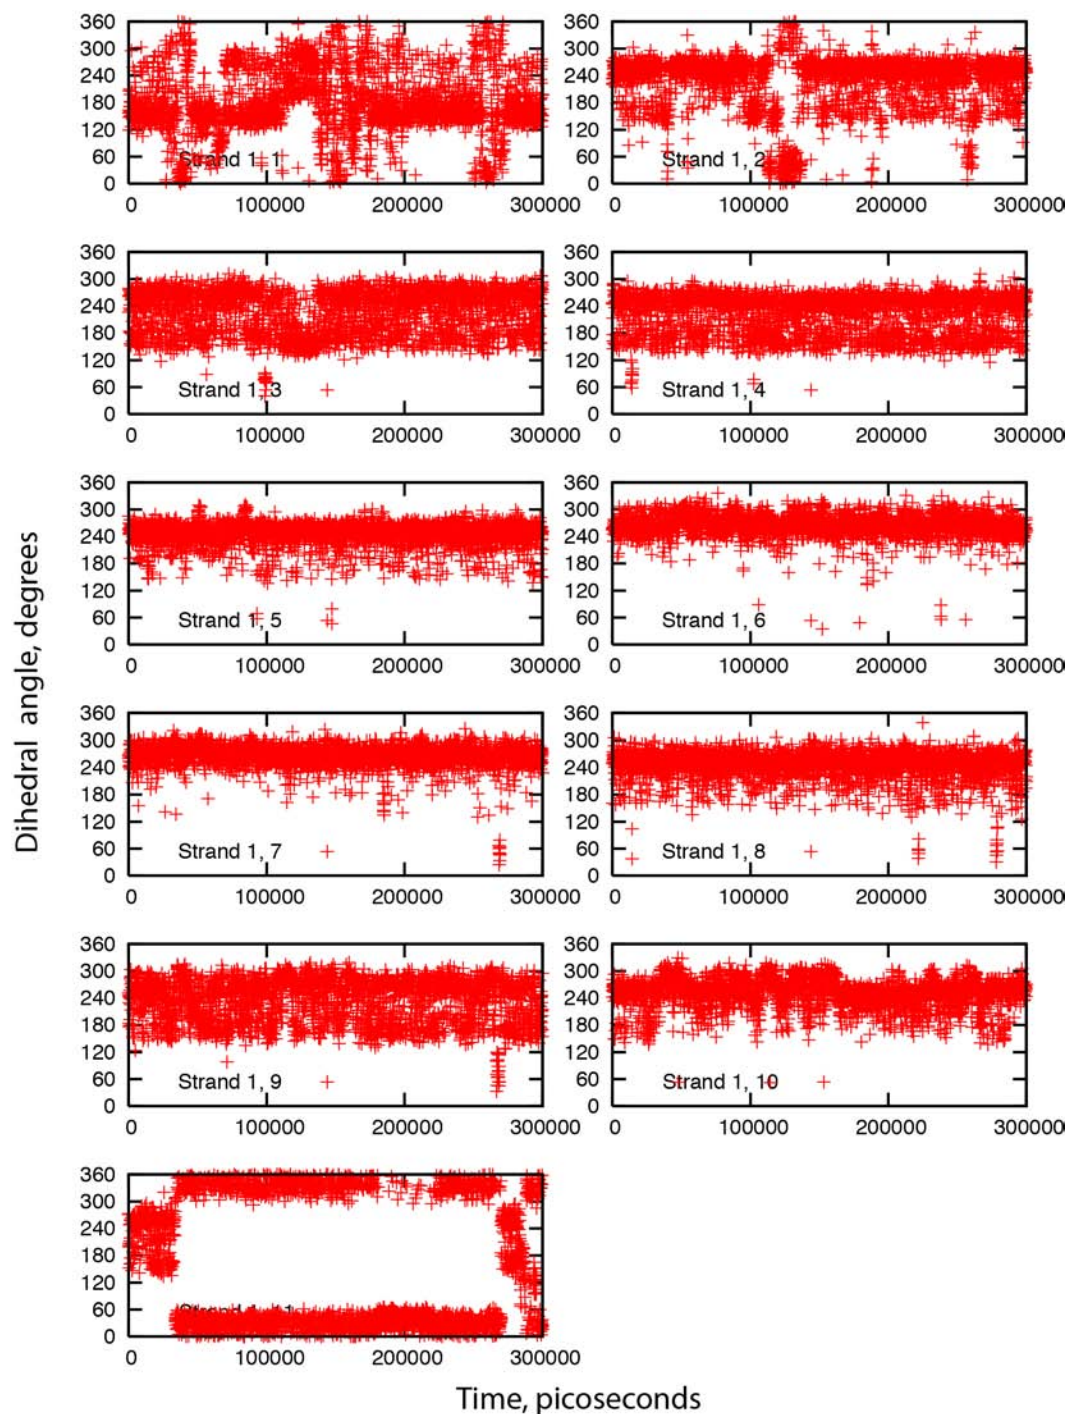

Dihedral angle, degrees

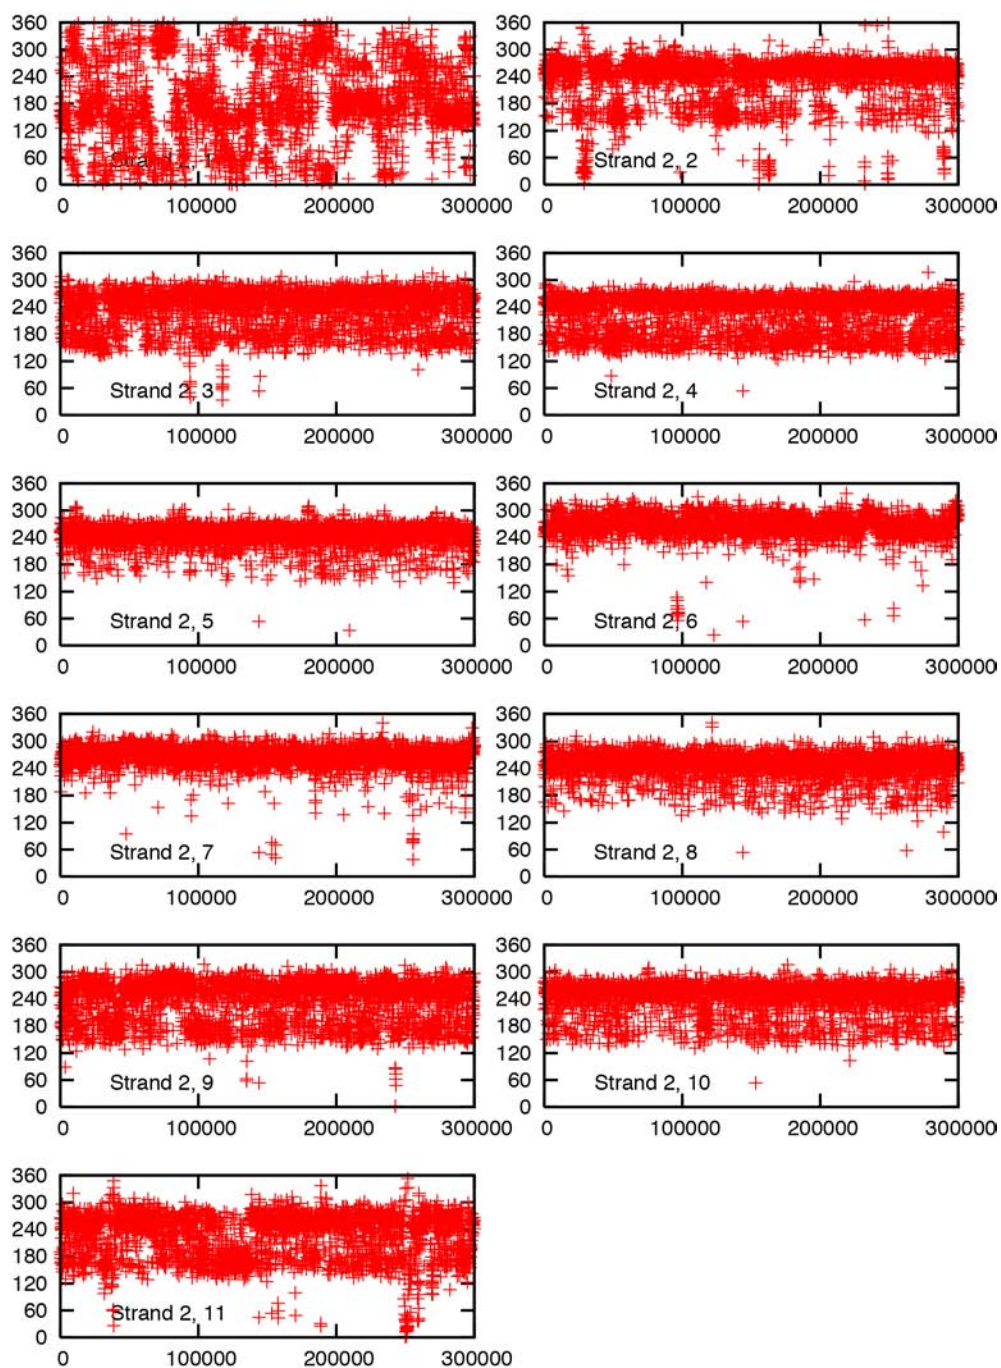

Time, picoseconds



Figure S8) Selected helicoidal parameters as a function of nucleotide from the 100 ns EcoRI simulations with the C27 (black), C27\_2b (red) and AMBER Parm99bsc0 (green) force fields along with values from the EcoRI crystal structure 1BNA (blue). Error bars represent the RMS fluctuations. The X labels indicate the top base pair (bp) for the bp to bp+1 step. The terminal nucleotides are omitted from the analysis.

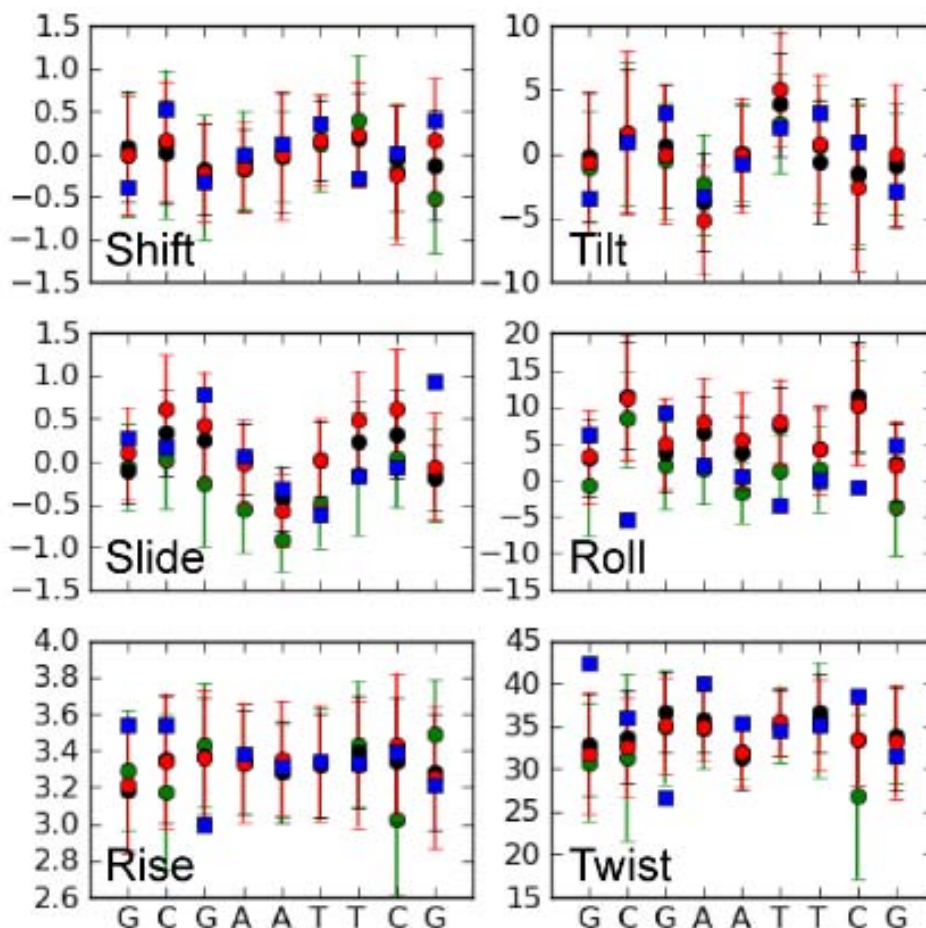

## References

1. Saenger, W., *Principles of Nucleic Acid Structure*. 1984, New York: Springer-Verlag.
2. Heddi, B., N. Fologne, N. Bouchemal, E. Hantz, and B. Hartmann, *Quantification of DNA BI/BII backbone states in solution. Implications for DNA overall structure and recognition*. *J Am Chem Soc*, 2006. **128**: p. 9170-7.
